# Supplementary material for: Predictive value of tumor mutation burden (TMB) with targeted next-generation sequencing in immunocheckpoint inhibitors for non-small cell lung cancer (NSCLC)
Source: PubMed Central journal article supplement (PMC7738995; doi:10.7150/jca.48105), 2021-01-01
Supplement: jcav12p0584s1.pdf [file jcav12p0584s1.pdf]

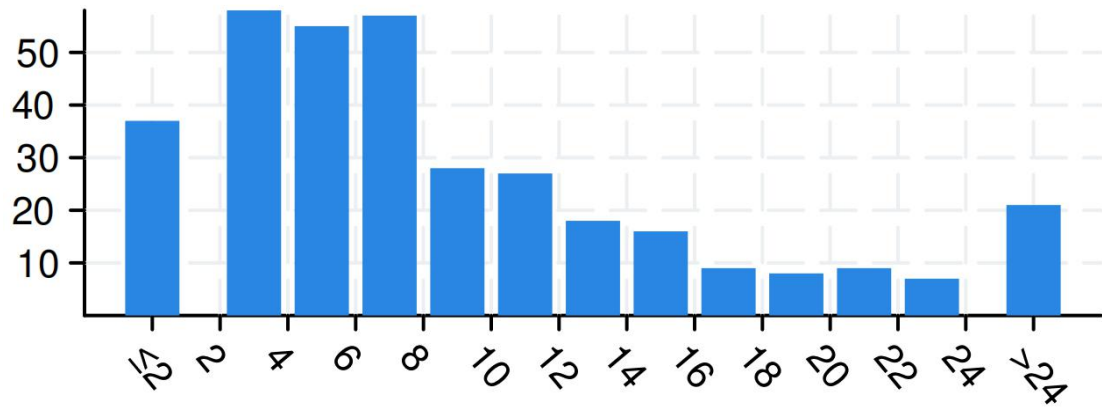

**sFigure 1.** TMB threshold histogram

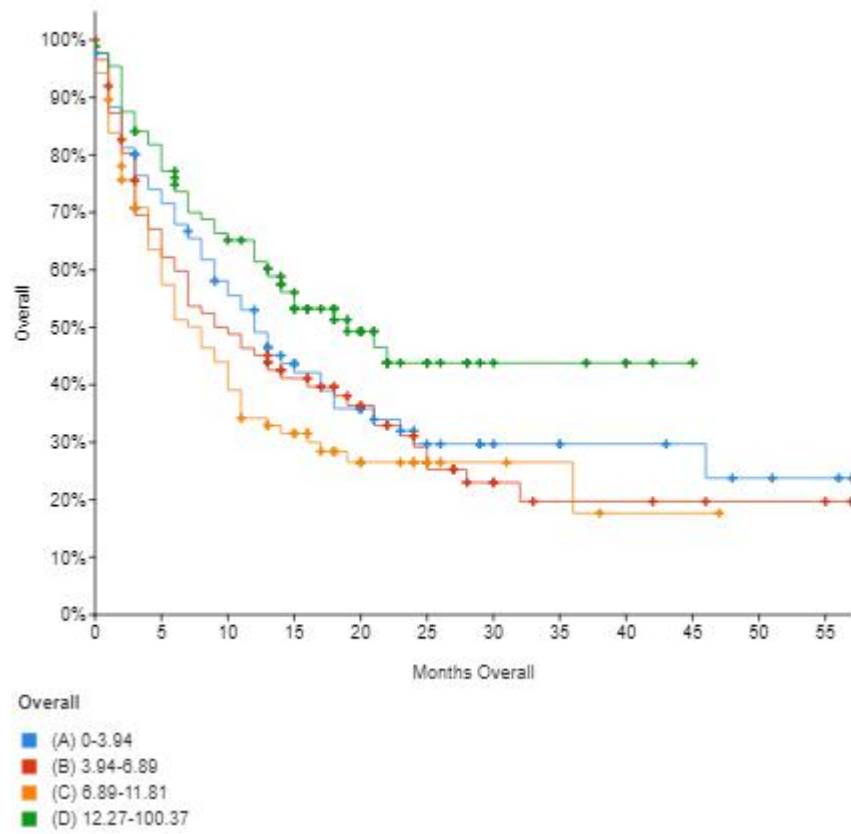

**sFigure 2.** Survival curves at different TMB thresholds
